# Supplementary material for: Function and regulation of plant ARGONAUTE proteins in response to environmental challenges: a review
Source: PeerJ. 2024 Mar 26;12:e17115. doi: 10.7717/peerj.17115 (PMC10979746; doi:10.7717/peerj.17115)
Supplement: Supplemental Information 3 [file peerj-12-17115-s003.xlsx]

## Sheet: Sheet1
Original IDs		Renamed
GRMZM2G361518	P01	ZmAGO1f
GRMZM2G461936	P02	ZmAGO5d
GRMZM2G123063	P01	ZmAGO5b
GRMZM2G354867	P01	ZmAGO2b
GRMZM2G457370	P01	ZmAGO18b
GRMZM5G892991	P01	ZmAGO7
GRMZM2G589579	P01	ZmAGO4
GRMZM2G059033	P01	ZmAGO5a
GRMZM2G007791	P01	ZmAGO2a
GRMZM2G105250	P01	ZmAGO18a
GRMZM2G039455	P01	ZmAGO1b
GRMZM2G347402	P01	ZmAGO5c
GRMZM2G141818	P03	ZmAGO9
GRMZM2G079080	P02	ZmAGO10b
GRMZM2G441583	P01	ZmAGO1a
AT1G31280.1		AtAGO2
AT1G31290.1		AtAGO3
AT1G48410.2		AtAGO1
AT1G69440.1		AtAGO7
AT2G27040.1		AtAGO4
AT2G27880.1		AtAGO5
AT2G32940.1		AtAGO6
AT3G50100.1		EXTRA
AT5G21150.1		AtAGO9
AT5G43810.1		AtAGO10
LOC_Os02g45070.1		OsAGO1a
LOC_Os04g47870.1		OsAGO1b
LOC_Os02g58490.1		OsAGO1c
LOC_Os06g51310.2		OSAGO1d
LOC_Os04g52540.1		OsAGO2
LOC_Os04g52550.1		OsAGO3
LOC_Os01g16870.3		OsAGO4a
LOC_Os04g06770.2		OsAGO4b
LOC_Os07g09020.1		OsAGO14
LOC_Os03g58600.1		OsMEL1
LOC_Os03g57560.1		OsAGO13
LOC_Os07g16224.1		OsAGO16
LOC_Os03g33650.1		SHL4
LOC_Os06g39640.1		OsPHN1
LOC_Os02g07310.1		OsAGO17
LOC_Os03g47820.1		OsAGO12
LOC_Os03g47830.1		OsAGO11
LOC_Os07g28850.1		OsAGO15
LOC_Os01g16850.1		OsAGO15
Sspon.01G0014460-1A		SsAGO5c
Sspon.01G0024300-1A		SsAGO18b
Sspon.01G0028360-2B		SsAGO5a
Sspon.01G0014460-2B		SsAGO5d
Sspon.01G0024300-3D		SsAGO18c
Sspon.01G0014460-3D		SsAGO5b
Sspon.02G0007830-1A		SsAGO18a
Sspon.02G0007830-2D		SsAGO18d
Sspon.02G0016200-2D		SsAGO4
Sspon.05G0030950-1C		SsAGO3b
Sspon.05G0030960-1C		SsAGO3a
Sspon.05G0030950-2D		SsAGO2a
Sspon.05G0037340-1D		SsAGO2d
Sspon.05G0030950-1P		SsAGO3c
Sspon.07G0020900-1A		SsAGO6a
Sspon.07G0020900-2D		SsAGO6b
Sspon.08G0006580-1A		SsAGO10b
Sspon.08G0006580-2B		SsAGO10c
Sspon.08G0006580-3C		SsAGO10e
Sspon.08G0006580-4D		SsAGO10d
Sspon.08G0006580-1P		SsAGO10a
